# Supplementary material
Source: Springer Nature journal article supplement (https://www.springermedizin.de/resource/supplementary/13229_2014_148_MOESM1_ESM.pdf/9676288)

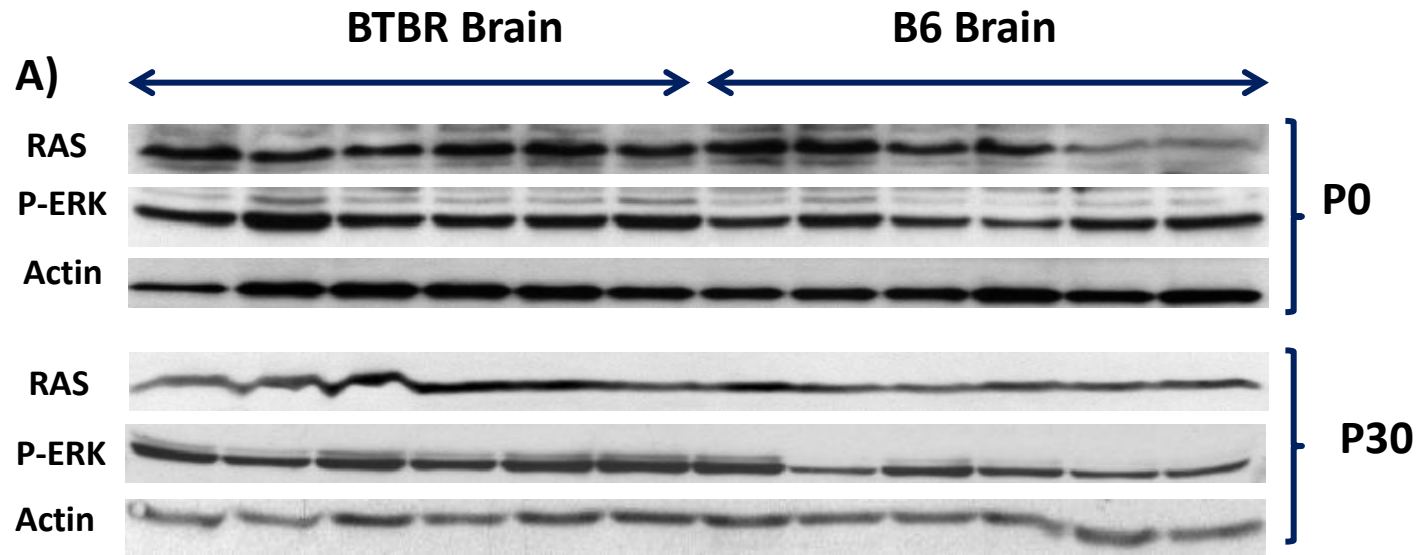

**B)**

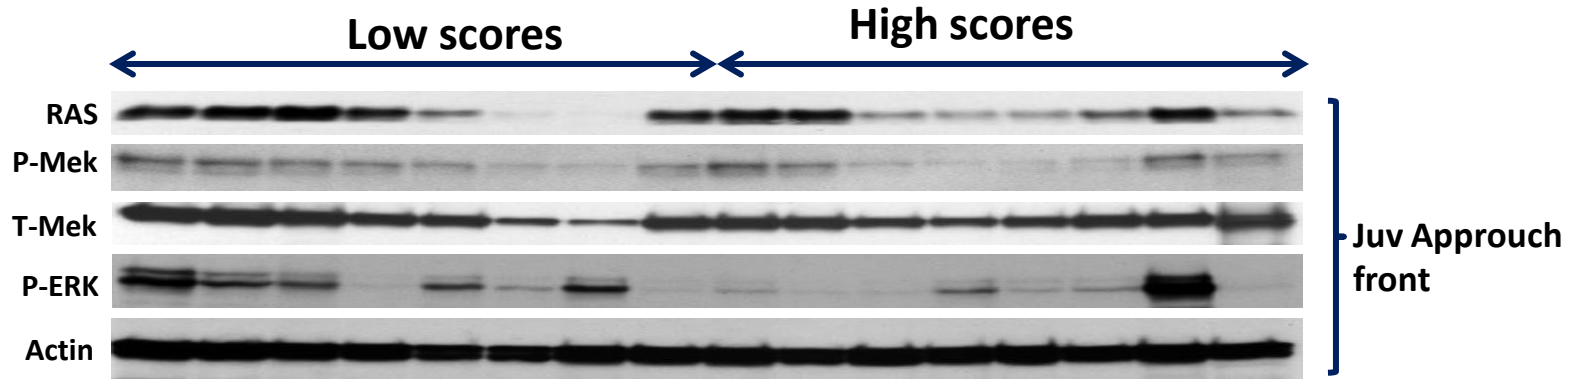

**C)**

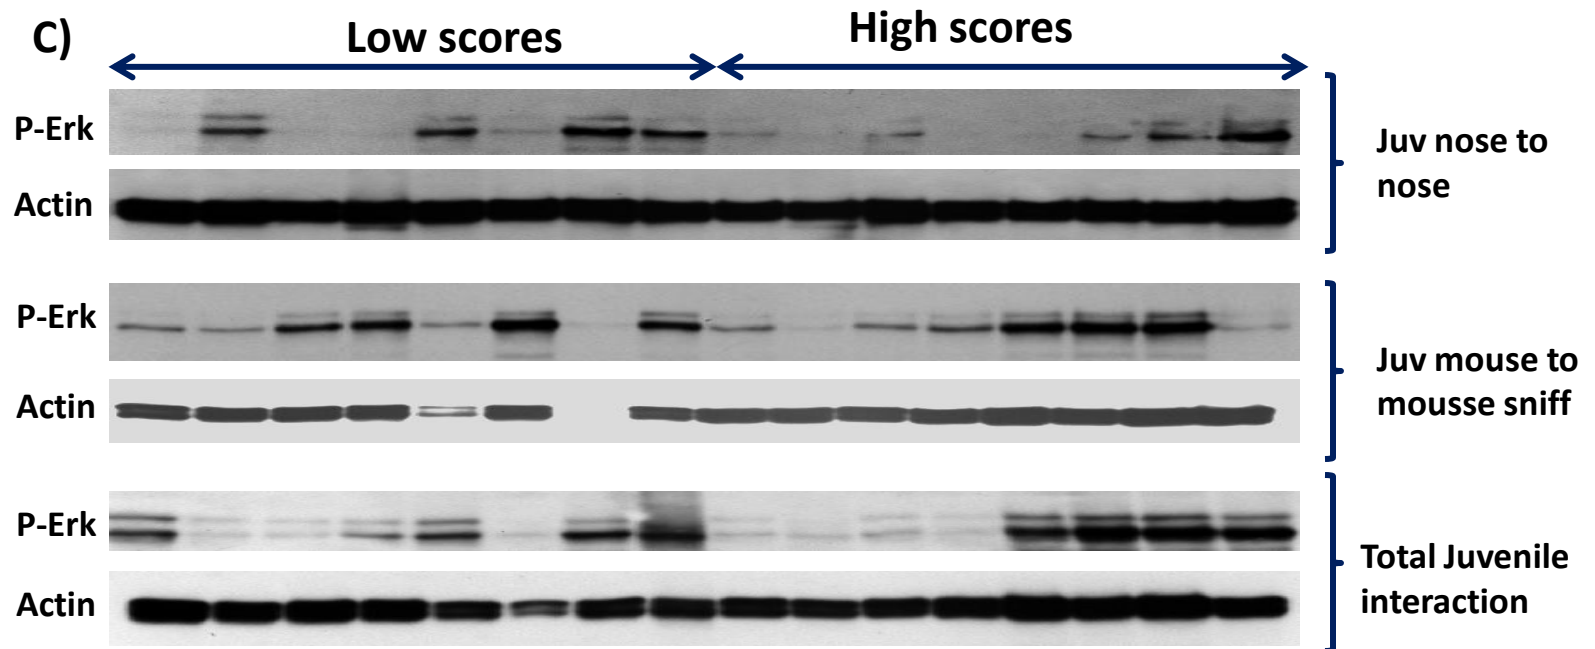

Supplement: MOESM1 [file 9676288]
